# Supplementary material for: Genomic and Immunological Tumor Profiling Identifies Targetable Pathways and Extensive CD8+/PDL1+ Immune Infiltration in Inflammatory Breast Cancer Tumors
Source: Oxford University Press journal article supplement (doi:10.1158/1535-7163.mct-15-0353), 2016-04-20
Supplement: 15357163mct150353-sup-148715_2_supp_3358925_t2lng2.xlsx [file 15357163mct150353-sup-148715_2_supp_3358925_t2lng2.xlsx]

## Sheet: Table S2
Supplementary Table S2: Tissue Information.
Sample ID		Estimated Tumor Percentage by Pathologist	Staging - Stage at diagnosis	HER2 Status	ER Status	PR Status	ALK Status
KAM-SO12-351	biopsy	0.8	Stage IV (metastatic)	Pos expr (3+) / FISH-Not Tested / No Mutation	Pos (2% Nuclei)	Neg	FISH-Not Tested
EMF-SO11-2449	biopsy	0.8	Stage IV (metastatic)	Neg expr (1) / FISH-Not Tested / S779_P780insVGS*	Neg	Neg	Amp
I-D-SO12-1579	biopsy	0.4	Stage IV (metastatic)	Expr-Not Tested / Amp / No Mutation	Neg	Neg	Amp
DSL-SO11-8030	biopsy	0.5	Stage IV (metastatic)	Equiv expr (2+) / Fish-Not Tested / No Mutation	Neg	Neg	FISH-Not Tested
B-M SO11-7347	biopsy	0.8	Stage IV (metastatic)	Expr-Not Tested / Not Amp / No Mutation	Neg	Neg	Not Amp?No rearrangements
LAT-SO11-3378	biopsy	0.8	Stage IV (metastatic)	Neg expr (0) / FISH-Not Tested / No Mutation	Neg	Neg	FISH-Not Tested
CES-SO12-85	biopsy	0.6	Stage IV (metastatic)	Expr - Not Tested / FISH-Not Tested / No Mutation	Not Tested	Not Tested	Amp
NR-S012-756-1B	biopsy	poor quality H&E	Stage IIIB. Progressed to metastatic	Expr- not tested/Amp	Neg	uninterpretable	Three copies of ALK; No rearrangements
CMW-S011-4588-1A	biopsy	0.5	Stage IV (metastatic)	Expr-not tested/Amp HER-2/Neu positive by IHC	Neg	Neg	3-4 copies ALK; No rearrangements
S011-4160-1B	biopsy	0.8	Stage IV (metastatic)	Pos expr (3+) / FISH-Not Tested- may be amplified /	Pos (>90% nuclei)	Pos (>90% nuclei)	UK
CE S011-5475-1A	biopsy	0.8	Stage IV (metastatic)	Pos expr (3+) / FISH-Not Tested- may be amplified /	Pos (>90% nuclei)	Neg	UK
ELS S011-6506-1A	biopsy	0.8	Stage IV (metastatic)	Pos expr (3+) / FISH-Not Tested- gene amp ratio of 13	Neg	Neg	UK
S011-872-1B	biopsy	0.25	Stage IIIB	UK	UK	UK	UK
S011-4558-3E	biopsy	0.8	Stage IIIA	NT	NT	NT	UK
S010-5215-1F	Lymph node biopsy, not IBC	0.7	Stage IV (metastatic)	UK	UK	UK	UK
S012-4469	biopsy	0.8	Stage IV (metastatic)	Negative (score 1+)	Neg	Neg	UK
SO12-5715	biopsy	0.8	Stage IV (metastatic)	Negative (score 0)	Neg	Neg	UK
RMS-10-008268	biopsy	0.8	Stage IIIB	Positive 3+	Pos	Neg	UK
S012-4731	biopsy	0.3	Stage IV (metastatic)	Positive (score 3)	Neg	Neg	UK
